# Supplementary material for: Expansion of Bone Precursors through Jun as a Novel Treatment for Osteoporosis-Associated Fractures
Source: PubMed Central journal article supplement — Stem Cell Reports. 2020 Mar 19;14(4):603–13. doi: 10.1016/j.stemcr.2020.02.009 (PMC7160304; doi:10.1016/j.stemcr.2020.02.009), 2020-03-19
Supplement: mmc1.pdf [file mmc1.pdf]

**Stem Cell Reports, Volume 14**

**Supplemental Information**

**Expansion of Bone Precursors through Jun as a Novel Treatment for  
Osteoporosis-Associated Fractures**

**Tristan Lerbs, Lu Cui, Claire Muscat, Atif Saleem, Camille van Neste, Pablo Domizi, Charles Chan, and Gerlinde Wernig**

## FACS Antibodies

| Antigen      | Manufacturer | Catalog# | Conjugation | Dilution |
|--------------|--------------|----------|-------------|----------|
| CD45         | Biologend    | 103110   | Pe-Cy5      | 1:200    |
| Ter119       | eBioscience  | 15592183 | Pe-Cy5      | 1:200    |
| Tie2         | eBioscience  | 14598785 | AF680       | 1:50     |
| CD51         | BD           | 551187   | PE          | 1:50     |
| CD105        | eBioscience  | 13105185 | Biotin      | 1:50     |
| 6c3          | Biologend    | 108312   | APC         | 1:100    |
| CD90.1       | eBioscience  | 47090082 | A780        | 1:100    |
| CD90.2       | eBioscience  | 47090282 | A780        | 1:100    |
| Streptavidin | eBioscience  | 25431782 | Pe-Cy7      | 1:100    |
| Live         |              |          | PI          | 1:400    |

## Antibodies for immunohistochemistry

| Antigen | Manufacturer | Catalog# | Dilution |
|---------|--------------|----------|----------|
| HRP     | abcam        | ab205718 | 1:200    |
| JUN     | abcam        | ab31419  | 1:100    |

## Primers

| Gene   | Primer# | Sequence                |
|--------|---------|-------------------------|
| Rose26 | Rosa A  | AAAGTCGCTCTGAGTTGTTAT   |
|        | Rosa B  | GCGAAGAGTTTGTCTCAACC    |
|        | Rosa C  | GGAGCGGGAGAAATGGATATG   |
| Jun    | ColA    | GCACAGCATTGCGGACATGC    |
|        | ColB    | CCCTCCATGTGTGACCAAGG    |
|        | ColC    | GCAGAAGCGCGGCCGTCTGG    |
| Cre    | Osx1    | GCAGCCTTCCAGAAGCAGAGC   |
|        | Osx2    | GCTGTCACTTGGTCGTGGCA    |
|        | Osx3    | TGCCACGACCAAGTGACAGC    |
|        | Osx4    | CCAGGTTACGGATATAGTTCATG |

## Accession numbers

| Gene | GenBank#   | Accession# |
|------|------------|------------|
| mJUN | CM000219.2 | CM000219   |

Supplementary Table 1. Antibodies and primer related to figures 1, 2, and 3.

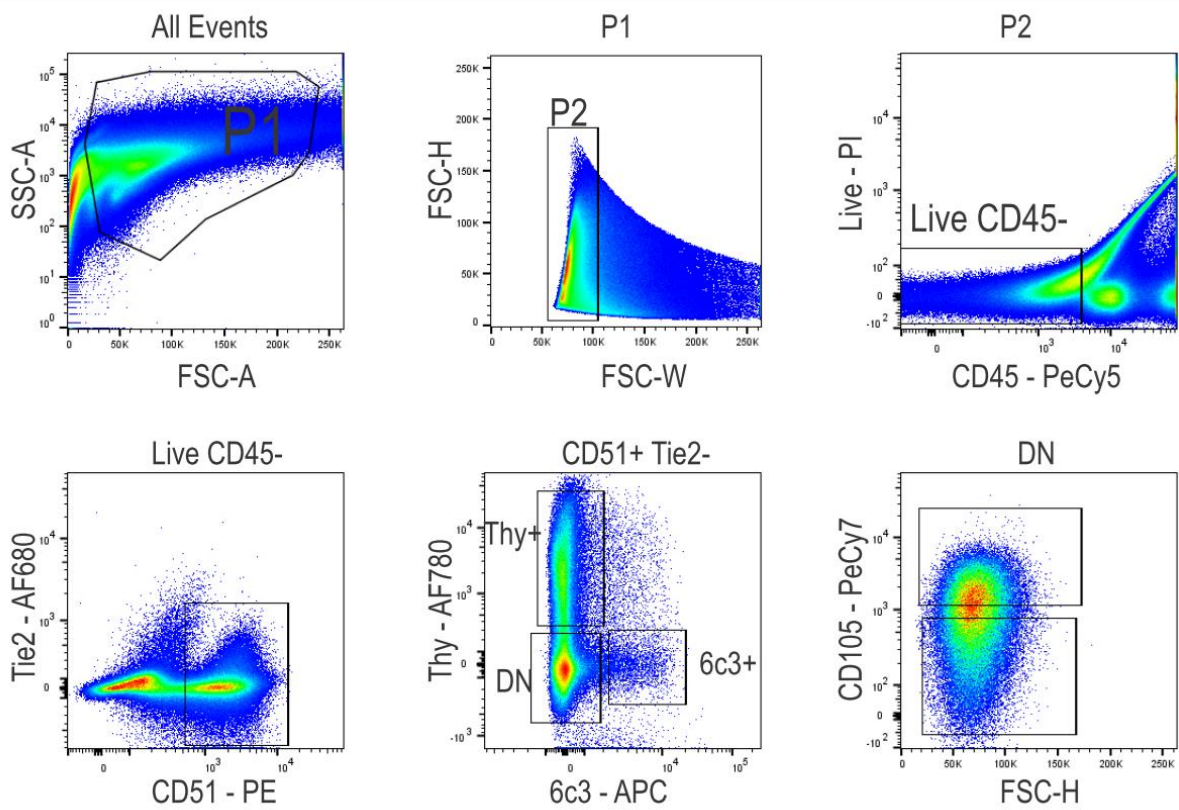

Supplementary Figure 1. Gating strategy for osteoprogenitors.
